# Supplementary material for: PPARα is involved in high-fat diet-induced risk avoidance impairment via the regulation of hippocampal BDNF
Source: Royal Society of Chemistry journal article supplement (doi:10.1039/d3fo01636f), 2023-01-01
Supplement: d3fo01636f1.xlsx [file d3fo01636f1.xlsx]

## Sheet: Figure 1
1B	Time (week)	WT-CON								WT-HFD								KO-CON								KO-HFD
	0	24.98	25.55	23.51	23.2	22.46	23.21	22.52	25.15	25.32	23.08	22.38	23.05	22.96	26.16	22.04	22.61	23.51	24.21	22.59	25.23	25.24	24.16	22.67	21.25	22	23.33	22.56	25.3	24.94	22.96	24.08	23.12
	1	25.52	26.96	22.64	24.19	23.27	23.55	23.47	25.68	26.78	23.8	23.66	24.33	23.88	27	22.8	23.96	23.13	25.2	24.15	25.93	25.92	24.71	23.55	22.54	21.44	24.05	22.74	26.27	25.5	26.28	21.19	23.98
	2	26.48	27.81	24.07	25.78	24.16	23.03	24.5	26.87	27.63	28.79	24.68	26	25.46	24.97	24.77	25.62	24.45	26.36	23.88	26.73	27.31	25.65	25.17	24.08	22.88	24.79	23.57	27.02	26.97	26.95	25.18	25.17
	3	27.11	29.21	24.56	26.35	25.7	23.86	24.58	26.45	28.34	30.49	25.89	27.2	26.57	25.74	25.71	27.56	24.71	27.7	24.54	27.6	29.3	26.32	25.68	24.84	24.37	25.54	24.35	28.41	28.36	26.86	26.41	26.52
	4	26.99	28.98	25.03	27.5	26.43	23.94	24.89	27.54	28.77	31.65	26.99	29.24	28.58	27.82	27.74	29.57	24.48	27.44	24.85	28.8	29.1	27.58	27.5	25.53	25.19	26.36	26.58	29.28	28.02	28.04	27.89	27.92
	5	26.81	30.05	25.51	28.01	27.82	23.61	25.15	27.34	28.64	31.59	27.28	30.64	29.12	27.82	27.75	30.07	24.48	28.88	24.81	28.33	29.76	26.06	27.68	25.81	26.36	26.8	27.29	29.03	28.15	29.22	28.34	28.07
	6	26.7	30.5	25.7	28.3	29	23.4	25.8	26.7	28.5	31.9	28.7	31.8	28.5	29	29	31.1	25.8	30.2	26	29.3	31.4	27.1	29	25.8	27.2	27.2	26.3	28.9	27.9	30.9	29.3	28.8
	7	26.4	29.6	26.5	26.9	28.4	25.1	27.5	28.5	28.9	33	29.8	32.2	29.6	31.3	30.6	32.3	25	31.3	25.1	28.7	31.7	25.8	29.7	26.2	27.4	25.9	26.5	29	28.7	32.3	29.3	27.8
	8	27.6	30.3	27.9	27.5	29.1	24.1	28.3	28.4	29.4	36.2	30.5	33	31.1	31.8	32.1	34.6	22.9	32.3	26.3	29.9	33.5	27.9	31.4	27.2	30.5	28	28.5	31	30.9	34	29.9	29
	9	27.8	29.9	28.3	28.2	29.3	23.5	28.7	28.4	29.5	38.1	30.8	33.3	31.5	32.1	33.2	35.7	21.3	32.3	26.5	30.4	33.3	29.1	32.5	26.8	31.1	29.5	28.3	32.6	31.7	35	29.9	29
1C	WT-CON	WT-HFD	KO-CON	KO-HFD
	27.8	29.5	21.3	31.1
	29.9	38.1	32.3	29.5
	28.3	30.8	26.5	28.3
	28.2	33.3	30.4	32.6
	29.3	31.5	33.3	31.7
	23.5	32.1	29.1	35
	28.7	33.2	32.5	29.9
	28.4	35.7	26.8	29
1D	WT-CON	WT-HFD	KO-CON	KO-HFD
	1.42	3.58	1.49	5.4
	4.05	9.92	7.09	2.57
	2.99	7.42	2.51	3.94
	3.7	9.15	3.47	3.7
	5.94	6.64	6.46	3.76
	1.89	5.14	1.64	9.34
	4.98	8.56	7.03	5.22
	3.35	9.69	4.95	4.68
1E	Time (min)	WT-CON				WT-HFD					KO-CON						KO-HFD
	0	3.4	3.1	4.3	3.2	3.5	3.5	2.9	3.8	4.6	2.6	3	2.6	3.3	2.4	2.3	3.8	3.7	2.8	3.4	4.1
	30	11.4	13.5	14.1	13.1	17.2	17.2	15.3	16.2	17.3	14.4	12.8	13.7	11.4	13.2	12.2	16.8	12.6	13.7	14.5	16.3
	60	9.1	8.3	7.5	8.1	12.6	10.4	11.4	13.7	12.3	7.2	5.7	6.5	5	6.9	6.2	13.1	16.3	10.9	13.1	12.1
	120	5.2	5.1	4.8	4.5	7.6	6.4	5.1	6.6	6.6	3.3	2.7	2.6	3.2	2.8	2.9	6.3	6.1	4.1	5.1	4.8
1F	WT-CON	WT-HFD	KO-CON	KO-HFD
	958.5	1364	894	1340
	978	1229	766.5	1350
	969	1169	820.5	1067
	940.5	1358	712.5	1229
		1340	826.5	1239
			766.5

## Sheet: Figure 2
2B	WT-CON	WT-HFD	KO-CON	KO-HFD		2E	WT-CON	WT-HFD	KO-CON	KO-HFD		2G	WT-CON	WT-HFD	KO-CON	KO-HFD		2I	WT-CON	WT-HFD	KO-CON	KO-HFD
	1200	300	1200	377			17	19	23	17			25	16	22	13			15.807	26.207	21.757	10.549
	1200	150	69	175			29	17	23	30			19	18	25	20			33.413	17.153	25	14.228
	1200	16	1200	45			13	26	27	20			29	24	10	12			20.349	9.146	9.204	40.397
	1200	196	262	140			3	26	7	25			28	21	16	31			23.921	21.976	33.727	17.722
	1200	246	1200	34			9	15	26	33			31	20	24	24			19.89	24.833	21.856	10.951
		101	332	50			29	29	14	13			8	21	20	20			28.997	26.213	19.922	30.648
			1200	120			35	23	12	28				27	21	22			19.605	25.944	17.889	32.759
			420.1					26	22	17					18				20.821	9.029	7.339	14.208
2C	WT-CON	WT-HFD	KO-CON	KO-HFD		2F	WT-CON	WT-HFD	KO-CON	KO-HFD		2H	WT-CON	WT-HFD	KO-CON	KO-HFD		2J	WT-CON	WT-HFD	KO-CON	KO-HFD
	0	15	0	11			58.72	103.94	107.89	75.06			49.3	104.7	121.3	64.8			25	30	33	15
	0	31	37	26			85.97	92.07	96	154.76			120	78	100.3	97.7			42	4	53	14
	0	30	0	0			71.84	104.92	89.76	131.28			42.7	138.4	76.5	69.5			33	3	21	50
	0	21	27	10			65.05	154.67	74.63	131.59			56.3	100.6	116.7	110.7			28	10	33	4
	0	23	0	46			52.2	63.66	118.76	137.36			117.9	114.6	62.2	153.1			12	44	59	5
		5	30	18			84.18	127.45	107.13	60.22			32.8	141.7	109.1	110.8			55	10	14	50
			0	20			113.57	139.54	97.35	133.89				99.2	185.1	160.5			8	44	25	64
			13	26				109.4	80.27	118.54					93.3	193.7			11	9	0	25
2D	WT-CON	WT-HFD	KO-CON	KO-HFD														2K	WT-CON	WT-HFD	KO-CON	KO-HFD
	0	25.17	0	20.07															67.5	72.3	95.5	125.7
	0	111.13	90.36	51.1															111.2	29.7	273.8	19.7
	0	73.15	0	0															92	6.7	157.2	105.3
	0	56.05	85.77	39.89															52.8	32.1	63.9	0.7
	0	112.58	0	202															21.3	99.6	143.9	22.6
		9.82	121.73	63.11															158.4	75.2	110.6	132.9
			0	76.2															7.5	106.4	66.5	140
			42.32	91.38															17	10.2	0	190
																		2L	WT-CON	WT-HFD	KO-CON	KO-HFD
																			4.336	2.4	4.402	2.807
																			7.599	7.4	8.004	0.742
																			6.33	2.2	2.909	9.225
																			4.89	3.2	4.78	0.18
																			1.631	5.562	6.695	0.796
																			9.373	2.818	3.082	5.321
																			0.957	6.118	3.092	9.031
																			1.439	0.439	0	3.411

## Sheet: Figure 3
3A	WT-CON	WT-HFD	KO-CON	KO-HFD		3E	WT-CON	WT-HFD	KO-CON	KO-HFD
	36	34	30	11			0.451326	0.162959	0.810179	0.726871
	40	41	43	40			0.227075	0.346841	0.640715	0.638942
	45	39	54	29			0.163132	0.424452	0.444006	0.646435
	46	34	32	30			0.329912	0.59526	0.245423	0.610984
	26	28	18	50			0.305321	0.400797	0.640949	0.373
	39	50	47	33			0.491418	0.305181	0.716818
	28	31	41	25			0.748358	0.263933	0.600696
	25	32		20				0.753688	0.357137
3B	WT-CON	WT-HFD	KO-CON	KO-HFD		3F	WT-CON	WT-HFD	KO-CON	KO-HFD
	55.56	55.88	63.33	63.64			0.39324	0.287767	-0.24023	0.564072
	55	51.11	69.77	52.5			0.715022	0.361933	-0.72312	0.498102
	55.55	61.54	55.55	34.48			0.252704	0.176639	0.204319	-0.36838
	54.35	50	56.25	40			0.2983	0.843972	0.36613	0.167199
	73.08	53.57	44.44	58			0.28917	0.790376	0.756134	0.639621
	48.72	58	61.7	54.54			-0.03269	0.38527	-0.00647	0.748173
	67.86	45.16	58.54	60				0.395896	0.187164	0.265312
	40	62.5		70				0.580905	-0.33839
3C	WT-CON	WT-HFD	KO-CON	KO-HFD		3G	WT-CON	WT-HFD	KO-CON	KO-HFD
	-0.2342	0.5114	0.5387	0.2185			168.34	186.13	130.89	188.25
	0.038	-0.2317	0.2713	0.2516			132.05	187.45	136.71	192.95
	0.4417	0.5454	0.4979	-0.373			143.22	191.07	155.53	183.11
	0.9229	0.7915	0.3333	0.4422			168.06	177.38	179.75	182.94
	0.5016	-0.5336	0.3729	0.0864			161.2	152.66	147.19	183.23
	0.598	-0.3501	0.9221	0.3316			185.64	207.53	154	188.26
		0.5108	0.4048	0.1667			148.88	201.85	148.47	140.73
		0.867	0.3639	-0.0379			130.43	161.04	168.16	172.38
3D	WT-CON	WT-HFD	KO-CON	KO-HFD		3H	WT-CON	WT-HFD	KO-CON	KO-HFD
	0.4731	0.3788	0.5053	0.0301			217.29	221.59	214.15	228.67
	0.3554	0.4216	0.8803	0.0237			157.49	196.95	188.5	215.54
	0.3715	-0.2806	0.1236	0.1559			166.12	183.05	178.92	161.74
	0.2415	0.4447	0.582	0.6199			192.73	230.04	175.6	186.73
	0.3384	0.144	0.0184	-0.0906			171.19	172.3	162.15	176.52
	0.5691	-0.2157	-0.3172	0.1554			158.87	194.86	227.27	203.74
	0.3559	0.0125		0.5611			214.89		120.34	175.24
	0.2943

## Sheet: Figure 4
4D-CA1	WT-CON	WT-HFD	KO-CON	KO-HFD
	1.03483	0.701493	0.636816	0.492537
	0.955224	0.965174	0.502488	0.59204
	0.945274	0.741294	0.870647	0.950249
	1.06468	0.895522	0.547264	0.656716
4D-CA3	WT-CON	WT-HFD	KO-CON	KO-HFD
	0.863262	0.60626	1.04119	0.889621
	1.04119	1.25865	0.784185	0.896211
	0.876442	0.856672	1.04778	1.27842
	1.21911	0.90939	0.698517	0.830313
4D-DG	WT-CON	WT-HFD	KO-CON	KO-HFD
	0.859504	0.628099	0.545455	0.892562
	0.92562	0.958678	0.644628	0.578512
	0.991736	0.876033	0.628099	0.446281
	1.22314	0.77686	0.578512	0.958678
4E-NAc Core	WT-CON	WT-HFD	KO-CON	KO-HFD
	0.73209	1.04776	0.953731	0.633582
	0.870896	1.09254	1.12836	0.707463
	1.39701	1.21343	0.797015	0.532836
		0.868657		0.875373
4E-NAc Shell	WT-CON	WT-HFD	KO-CON	KO-HFD
	0.89418	0.941799	1.07936	0.671958
	0.952381	1.04233	1.1164	0.751323
	1.15344	1.33862	0.931217	0.693122
		1.2328		1.1164
4F	WT-CON	WT-HFD	KO-CON	KO-HFD
	0.812332	1.25469	0.840483	1.04289
	0.607239	1.47185	0.852547	0.800268
	1.58043	0.88874	0.802279	1.10992
		1.79357	0.864611	0.91689
4G	WT-CON	WT-HFD	KO-CON	KO-HFD
	0.568306	0.874317	1.70492	1.35519
	1.13661	1.81421	1.0929	1.59563
	1.00546	3.23497	1.18033	0.830601
	1.28962	1.96721	2.01093	1.39891

## Sheet: Figure 5
5B	WT-CON	WT-HFD	KO-CON	KO-HFD		5G	WT-CON	WT-HFD	KO-CON	KO-HFD		5K	WT-CON	WT-HFD	KO-CON	KO-HFD
	0.905907	0.879775	0.956719	1.10044			1.18783	0.350706	0.192554	0.606397			1.00444	0.577287	0.990054	1.51053
	0.942201	0.96543	1.15126	1.00172			0.981686	0.703847	1.1355	0.467596			0.74792	0.801371	0.410889	0.900175
	1.11823	0.993013	0.866709	0.969059			0.728668	0.3423	0.527899	0.675175			0.956417	0.256103	0.452833	0.927423
	1.03366	0.977044	0.87542	0.877597			0.866537	0.520631	0.675175	0.860551			1.30238	0.378866	1.30238	1.31114
							1.05215			1.21279			0.988835	0.168704	0.956267	0.761349
5C	WT-CON	WT-HFD	KO-CON	KO-HFD			1.29086								0.373812	0.500266
	0.922922	1.04584	1.27859	1.1728
	0.955164	1.10025	1.30579	1.0398		5H	WT-CON	WT-HFD	KO-CON	KO-HFD		5L	WT-CON	WT-HFD	KO-CON	KO-HFD
	1.16675	0.937028	1.02771	1.09118			1.16406	0.73162	0.370917	0.619496			0.854089	0.960416	0.925694	0.845677
	0.955164	0.888665	0.949118	0.707305			1.60677	0.687374	0.891413	0.600471			1.06347	1.00799	0.935882	0.791621
							0.90073	1.18852	0.682626	0.588114			0.93405	0.914935	0.889258	0.877941
5D	WT-CON	WT-HFD	KO-CON	KO-HFD			0.670899	0.526376	1.23899	0.916475			1.04292	1.25764	1.08392	0.942742
	1.00071	0.979976	1.01013	1.04217			0.849194	0.481019		1.27382			1.10548	1.14196	0.969427	1.15433
	0.981861	0.98563	0.930978	0.983746			1.04186								1.02285	1.02237
	1.04311	1.15336	0.848057	1.0417
	0.974323	0.961131	0.986572	0.870671		5I	WT-CON	WT-HFD	KO-CON	KO-HFD		5M	WT-CON	WT-HFD	KO-CON	KO-HFD
							1.3418	0.51376	0.20793	0.51376			1.01302	1.25974	1.3045	1.1894
5E	WT-CON	WT-HFD	KO-CON	KO-HFD			1.30059	0.258667	0.910144	0.73416			0.862	1.50214	1.16147	1.16876
	1.48882	1.37952	0.808975	0.90073			0.916475	1.24761	0.621647	0.652553			1.00005	1.39956	1.25704	1.17419
	2.04793	1.35582	1.40363	1.00289			0.654818	0.382668	1.10509	1.08611			1.00216	0.794998	0.92423	1.02988
	1.02042	1.65195	1.03467	1.03109			0.916475	0.602556		1.64054			1.12277	0.80402	0.681218	0.792327
	0.38801	0.852143	1.93746	2.24104			1.04186								0.67961	0.813878
	0.867038	0.68976		2.41022
	0.955393					5J	WT-CON	WT-HFD	KO-CON	KO-HFD		5N	WT-CON	WT-HFD	KO-CON	KO-HFD
							1.31646	0.518231	0.201894	0.756109			1.15788	1.13774	1.25029	1.07626
5F	WT-CON	WT-HFD	KO-CON	KO-HFD			0.940609	0.730353	1.39152	0.865537			1.24566	1.36319	1.13681	1.02477
	1.19748	0.568408	0.496546	0.815072			0.844791	0.323462	0.655954	0.99424			1.04903	1.31913	1.09046	0.899833
	1.41421	0.739694	1.28788	0.668964			0.902292	0.593231	0.844791	0.801996			0.80151	0.848597	1.15112	0.987566
	0.913831	1.27456	0.867539	0.864537			1.04006			1.37713			0.745921	0.948501	1.02226	0.980143
	0.626332	0.471392	1.07549	1.32409			1.01866								0.878155	0.855061
	0.965936	0.537747		1.68179
	1.06807
